# Supplementary material for: Free-Living Dietary Intake in Tactical Personnel and Implications for Nutrition Practice: A Systematic Review
Source: MDPI journal article supplement (doi:10.3390/nu13103502), 2021-10-03
Supplement: s1 [file s1]

*Systematic Review*

# Free-Living Dietary Intake in Tactical Personnel and Implications for Nutrition Practice: A Systematic Review

Kristen L MacKenzie-Shalders<sup>1\*</sup>, Angela Tsoi<sup>1</sup>, Ka Wing Lee<sup>1</sup>, Charlene Wright<sup>1,2</sup>, Gregory Cox<sup>1</sup>, and Robin Orr<sup>3</sup>

<sup>1</sup> Nutrition and Dietetics, Faculty of Health Sciences and Medicine, Bond University, Queensland: Australia, 4226; kmackenz@bond.edu.au; angela.tsoi@student.bond.edu.au; kawing.lee@student.bond.edu.au; gcox@bond.edu.au; cwright@bond.edu.au

<sup>2</sup> School of Medicine and Dentistry, Centre of Applied Health Economics and Menzies Health Institute Queensland, Griffith University; charlene.wright@griffithuni.edu.au

<sup>3</sup> Tactical Research Unit, Bond University, Queensland: Australia, 4226

\* Correspondence: kmackenz@bond.edu.au; Tel.: +61755951018

## SUPPLEMENTARY MATERIAL

**Table S1:** Search strategy implemented across four electronic databases from 1990 up until 28 October 2020

**Table S2:** Quality assessment as per the Academy of Nutrition and Dietetics Quality Criteria Checklist.

**Table S1:** Search strategy implemented across four electronic databases from 1990 up until 28 October 2020

|                                                                                                                                                                                                                                                                                                                                                                                                                                                                                                                                                                                                                                                                                                                                                                                                                                                                                                                                                                                                                                                                                                                                                                                                                                                                                                                                                                                                                                                                                                                                                                                                                                                                                                                                                                                                                                                 |
|-------------------------------------------------------------------------------------------------------------------------------------------------------------------------------------------------------------------------------------------------------------------------------------------------------------------------------------------------------------------------------------------------------------------------------------------------------------------------------------------------------------------------------------------------------------------------------------------------------------------------------------------------------------------------------------------------------------------------------------------------------------------------------------------------------------------------------------------------------------------------------------------------------------------------------------------------------------------------------------------------------------------------------------------------------------------------------------------------------------------------------------------------------------------------------------------------------------------------------------------------------------------------------------------------------------------------------------------------------------------------------------------------------------------------------------------------------------------------------------------------------------------------------------------------------------------------------------------------------------------------------------------------------------------------------------------------------------------------------------------------------------------------------------------------------------------------------------------------|
| <i>MEDLINE (via PubMed) - searched 28 October 2020 using keywords (title and abstract) and MeSH Terms. Result = 4,841 records</i>                                                                                                                                                                                                                                                                                                                                                                                                                                                                                                                                                                                                                                                                                                                                                                                                                                                                                                                                                                                                                                                                                                                                                                                                                                                                                                                                                                                                                                                                                                                                                                                                                                                                                                               |
| ("Police"[MeSH Terms] OR "law enforcement"[MeSH Terms] OR "Emergency Responders"[MeSH Terms] OR "military health"[MeSH Terms] OR "military personnel"[MeSH Terms] OR "Firefighters"[MeSH Terms] OR "tactical personnel"[Title/Abstract] OR "Emergency worker"[Title/Abstract] OR Military[Title/Abstract] OR army[Title/Abstract] OR "Customs Officer"[Title/Abstract] OR Marines[Title/Abstract] OR "Defence personnel"[Title/Abstract] OR "National guard"[Title/Abstract] OR "national guards"[Title/Abstract] OR FBI[Title/Abstract] OR sheriff*[Title/Abstract] OR "Patrol officer"[Title/Abstract] OR Firefighter*[Title/Abstract] OR Fireman[Title/Abstract] OR firemen[Title/Abstract] OR "Law Enforcement"[Title/Abstract] OR Police*[Title/Abstract] OR "Emergency Responder"[Title/Abstract] OR "emergency responders"[Title/Abstract] OR SES[Title/Abstract] OR "state emergency service"[Title/Abstract] OR "fire rescue"[Title/Abstract])<br>AND<br>("Diet"[MeSH Terms] OR "Nutrients"[MeSH Terms] OR "Feeding Behavior"[MeSH Terms] OR "eating"[MeSH Terms] OR "Dietary Carbohydrates"[MeSH Terms] OR "Nutrition assessment"[MeSH Terms] OR "Diet Surveys"[MeSH Terms] OR "Diet Records"[MeSH Terms] OR Diet*[Title/Abstract] OR Nutr*[Title/Abstract] OR "food intake"[Title/Abstract] OR "Eating behaviour"[Title/Abstract] OR "eating behaviours"[Title/Abstract] OR "eating patterns"[Title/Abstract] OR "eating pattern"[Title/Abstract] OR "eating habit"[Title/Abstract] OR "eating habits"[Title/Abstract] OR "food recall"[Title/Abstract] OR "food recalls"[Title/Abstract] OR "food record"[Title/Abstract] OR Macronutrient*[Title/Abstract] OR Carbohydrat*[Title/Abstract] OR Fat[Title/Abstract])                                                                                                                 |
| <i>CINAHL (via Ebscohost) was searched on 28 October 2020 using keywords and CINAHL Headings. Results 4080 records</i>                                                                                                                                                                                                                                                                                                                                                                                                                                                                                                                                                                                                                                                                                                                                                                                                                                                                                                                                                                                                                                                                                                                                                                                                                                                                                                                                                                                                                                                                                                                                                                                                                                                                                                                          |
| ((MH "Police") OR (MH "Military Health") OR (MH "Military Personnel+") OR (MH "Firefighters") OR (TI "tactical personnel" OR AB "tactical personnel") OR (TI "Emergency worker" OR AB "Emergency worker") OR (TI Military OR AB Military) OR (TI army OR AB army) OR (TI "Customs Officer" OR AB "Customs Officer") OR (TI Marines OR AB Marines) OR (TI "Defence personnel" OR AB "Defence personnel") OR (TI "National guard" OR AB "National guard") OR (TI "national guards" OR AB "national guards") OR (TI FBI OR AB FBI) OR (TI sheriff* OR AB sheriff*) OR (TI "Patrol officer" OR AB "Patrol officer") OR (TI Firefighter* OR AB Firefighter*) OR (TI Fireman OR AB Fireman) OR (TI firemen OR AB firemen) OR (TI "Law Enforcement" OR AB "Law Enforcement") OR (TI Police* OR AB Police*) OR (TI "Emergency Responder" OR AB "Emergency Responder") OR (TI "emergency responders" OR AB "emergency responders") OR (TI SES OR AB SES) OR (TI "state emergency service" OR AB "state emergency service") OR (TI "fire rescue" OR AB "fire rescue"))<br>AND<br>((MH "Diet+") OR (MH "Nutrients+") OR (MH "Eating Behavior+") OR (MH "Eating") OR (MH "Dietary Carbohydrates+") OR (MH "Nutrition assessment") OR (MH "Diet Records") OR (TI Diet* OR AB Diet*) OR (TI Nutr* OR AB Nutr*) OR (TI "food intake" OR AB "food intake") OR (TI "Eating behaviour" OR AB "Eating behaviour") OR (TI "eating behaviours" OR AB "eating behaviours") OR (TI "eating patterns" OR AB "eating patterns") OR (TI "eating pattern" OR AB "eating pattern") OR (TI "eating habit" OR AB "eating habit") OR (TI "food recall" OR AB "food recall") OR (TI "food recalls" OR AB "food recalls") OR (TI "food record" OR AB "food record") OR (TI Macronutrient* OR AB Macronutrient*) OR (TI Carbohydrat* OR AB Carbohydrat*) OR (TI Fat* OR AB Fat*)) |
| <i>Embase (via Ovid) was searched on 28 October 2020 using keywords and MeSH Headings. Results = 6355 records</i>                                                                                                                                                                                                                                                                                                                                                                                                                                                                                                                                                                                                                                                                                                                                                                                                                                                                                                                                                                                                                                                                                                                                                                                                                                                                                                                                                                                                                                                                                                                                                                                                                                                                                                                               |

---

'police'/exp OR 'law enforcement'/exp OR 'rescue personnel'/exp OR 'military health'/exp OR 'military personnel'/exp OR 'fire fighter'/exp OR 'tactical personnel':ti,ab OR 'emergency worker':ti,ab OR military:ti,ab OR army:ti,ab OR 'customs officer':ti,ab OR marines:ti,ab OR 'defence personnel':ti,ab OR 'national guard':ti,ab OR 'national guards':ti,ab OR fbi:ti,ab OR sheriff\*:ti,ab OR 'patrol officer':ti,ab OR firefighter\*:ti,ab OR fireman:ti,ab OR firemen:ti,ab OR 'law enforcement':ti,ab OR police\*:ti,ab OR 'emergency responder':ti,ab OR 'emergency responders':ti,ab OR ses:ti,ab OR 'state emergency service':ti,ab OR 'fire rescue':ti,ab

AND

'Diet'/exp OR 'Nutrients'/exp OR 'feeding behavior'/exp OR 'eating'/exp OR 'eating habit'/exp OR 'carbohydrate intake'/exp OR 'nutritional assessment'/exp OR 'diet'/exp OR 'medical record'/exp OR diet\*:ti,ab OR nutr\*:ti,ab OR 'food intake':ti,ab OR 'eating behaviour':ti,ab OR 'eating behaviours':ti,ab OR 'eating patterns':ti,ab OR 'eating pattern':ti,ab OR 'eating habit':ti,ab OR 'eating habits':ti,ab OR 'food recall':ti,ab OR 'food recalls':ti,ab OR 'food record':ti,ab OR macronutrient\*:ti,ab OR carbohydrat\*:ti,ab

---

*Web of Science was searched 28 October 2020 for the following keywords in topic or title (limits:). Results = 3302 records*

---

(TI=(Diet\* OR Nutr\* OR "food intake" OR "Eating behaviour" OR "eating pattern" OR "eating habit" OR "food recall" OR "food recalls" OR "food record" OR Macronutrient\*) OR AB=(Diet\* OR Nutr\* OR "food intake" OR "Eating behaviour" OR "eating pattern" OR "eating habit" OR "food recall" OR "food recalls" OR "food record" OR Macronutrient\*)) AND (TI=("tactical personnel" OR "Emergency worker" OR Military OR army OR "Customs Officer" OR "Defence personnel" OR "National guard" OR FBI OR sheriff\* OR "Patrol officer" OR Firefighter\* OR Fireman OR firemen OR "Law Enforcement" OR Police\* OR "Emergency Responder" OR "emergency responders" OR SES OR "state emergency service" OR "fire rescue") OR AB=("tactical personnel" OR "Emergency worker" OR Military OR army OR "Customs Officer" OR "Defence personnel" OR "National guard" OR "national guards" OR FBI OR sheriff\* OR "Patrol officer" OR Firefighter\* OR Fireman OR firemen OR "Law Enforcement" OR Police\* OR "Emergency Responder" OR "emergency responders" OR SES OR "state emergency service" OR "fire rescue"))

---

|       |               |
|-------|---------------|
| Total | 18578 records |
|-------|---------------|

---

**Table S2:** Quality assessment as per the Academy of Nutrition and Dietetics Quality Criteria Checklist.

| Author, year               | 1. Was the research question clearly stated? | 2. Was the selection of study subjects free from bias? | 3. Were study groups comparable? | 4. Was method of handling withdrawals described? | 5. Was blinding used to prevent introduction of bias? | 6. Were the intervention and any comparisons described in detail? Were intervening factors described? | 7. Were outcomes clearly defined and the measurements valid and reliable? | 8. Was the statistical analysis appropriate for the study design and type of outcome indicators? | 9. Are conclusions supported by results with biases and limitations taken into consideration? | 10. Is bias due to study's funding or sponsorship unlikely? | Overall study quality |
|----------------------------|----------------------------------------------|--------------------------------------------------------|----------------------------------|--------------------------------------------------|-------------------------------------------------------|-------------------------------------------------------------------------------------------------------|---------------------------------------------------------------------------|--------------------------------------------------------------------------------------------------|-----------------------------------------------------------------------------------------------|-------------------------------------------------------------|-----------------------|
| Beals et al., 2015         | Yes                                          | Yes                                                    | Yes                              | No                                               | N/A                                                   | No                                                                                                    | Yes                                                                       | Yes                                                                                              | Yes                                                                                           | No                                                          | Positive              |
| Bonnell et al., 2017       | Yes                                          | Yes                                                    | N/A                              | No                                               | N/A                                                   | N/A                                                                                                   | Yes                                                                       | Yes                                                                                              | Yes                                                                                           | N/A                                                         | Positive              |
| Briley et al., 1990        | Yes                                          | No                                                     | Yes                              | Yes                                              | N/A                                                   | N/A                                                                                                   | Yes                                                                       | Yes                                                                                              | Yes                                                                                           | N/A                                                         | Positive              |
| Carlson et al., 2013       | Yes                                          | Yes                                                    | Yes                              | N/A                                              | N/A                                                   | N/A                                                                                                   | Yes                                                                       | Yes                                                                                              | Yes                                                                                           | N/A                                                         | Positive              |
| Clemente et al., 2015      | Yes                                          | Yes                                                    | Yes                              | No                                               | N/A                                                   | N/A                                                                                                   | Yes                                                                       | Yes                                                                                              | Yes                                                                                           | N/A                                                         | Positive              |
| Copp et al., 1991          | Yes                                          | No                                                     | N/A                              | No                                               | N/A                                                   | Yes                                                                                                   | Yes                                                                       | Yes                                                                                              | No                                                                                            | No                                                          | Positive              |
| Deuster et al., 2003       | Yes                                          | No                                                     | N/A                              | No                                               | N/A                                                   | Yes                                                                                                   | Yes                                                                       | Yes                                                                                              | No                                                                                            | No                                                          | Positive              |
| Donadussi et al., 2009     | Yes                                          | Yes                                                    | N/A                              | No                                               | N/A                                                   | N/A                                                                                                   | Yes                                                                       | Yes                                                                                              | No                                                                                            | N/A                                                         | Neutral               |
| Etzion-Daniel et al., 2008 | Yes                                          | No                                                     | N/A                              | No                                               | N/A                                                   | N/A                                                                                                   | Yes                                                                       | Yes                                                                                              | Yes                                                                                           | N/A                                                         | Neutral               |
| Fallowfield et al., 2014   | Yes                                          | No                                                     | N/A                              | Yes                                              | N/A                                                   | Yes                                                                                                   | Yes                                                                       | Yes                                                                                              | Yes                                                                                           | No                                                          | Positive              |
| Gibson et al., 2017        | Yes                                          | Neutral                                                | N/A                              | No                                               | N/A                                                   | Yes                                                                                                   | Yes                                                                       | Yes                                                                                              | Yes                                                                                           | No                                                          | Positive              |
| Hart et al., 1992          | Yes                                          | Yes                                                    | No                               | No                                               | N/A                                                   | N/A                                                                                                   | Yes                                                                       | Yes                                                                                              | No                                                                                            | No                                                          | Positive              |
| Israeli et al., 2008       | Yes                                          | Yes                                                    | Yes                              | No                                               | N/A                                                   | N/A                                                                                                   | Yes                                                                       | Yes                                                                                              | No                                                                                            | N/A                                                         | Positive              |
| Johnson et al., 2020       | Yes                                          | Yes                                                    | N/A                              | Yes                                              | N/A                                                   | N/A                                                                                                   | Yes                                                                       | Yes                                                                                              | Yes                                                                                           | N/A                                                         | Positive              |
| Kosmadopoulos et al., 2020 | Yes                                          | No                                                     | N/A                              | Yes                                              | N/A                                                   | No                                                                                                    | No                                                                        | Neutral                                                                                          | Yes                                                                                           | Yes                                                         | Neutral               |
| Margolis et al., 2012      | Yes                                          | Yes                                                    | N/A                              | No                                               | N/A                                                   | Yes                                                                                                   | Yes                                                                       | Yes                                                                                              | Yes                                                                                           | Yes                                                         | Positive              |

|                          |     |     |     |    |     |     |     |         |     |     |          |
|--------------------------|-----|-----|-----|----|-----|-----|-----|---------|-----|-----|----------|
| Mullie et al., 2009      | Yes | Yes | No  | No | N/A | N/A | Yes | Yes     | No  | N/A | Neutral  |
| Nkondjock et al., 2010   | Yes | No  | N/A | No | N/A | No  | Yes | Yes     | Yes | No  | Positive |
| Rahmani et al., 2018     | Yes | Yes | Yes | No | N/A | N/A | Yes | Neutral | Yes | No  | Positive |
| Ramsey et al., 2013      | Yes | Yes | N/A | No | N/A | N/A | Yes | Yes     | Yes | N/A | Positive |
| Stark et al., 2019       | Yes | Yes | N/A | No | N/A | N/A | Yes | Yes     | No  | No  | Neutral  |
| Viravathana et al., 2005 | Yes | Yes | N/A | No | N/A | No  | Yes | Yes     | No  | N/A | Neutral  |
